# Supplementary material for: Selection on the Major Color Gene Melanocortin-1-Receptor Shaped the Evolution of the Melanocortin System Genes
Source: PubMed Central journal article supplement (PMC5751221; doi:10.3390/ijms18122618), 2017-12-05
Supplement: ijms-18-02618-s001.pdf [file ijms-18-02618-s001.pdf]

## Supplementary Information

2 **Supplementary table 1. Evolutionary conservation and selection within ten genes of the melanocortin system in vertebrates.** The conservation of the genes was  
 3 measured as the percentage of identity and for completeness we report the number of sites with 95% conservation and proportion of conserved sites in the alignments. We  
 4 used the MEME model to identify codons under neutral, positive, or purifying selection; these measures were obtained by considering only the codons that could be  
 5 unambiguously assigned to one of these categories.

| Gene         | # nucleotides<br>in alignment | Conservation     |                                               |                                                    | Selection                          |                                          |                                      |                                          |                                          |
|--------------|-------------------------------|------------------|-----------------------------------------------|----------------------------------------------------|------------------------------------|------------------------------------------|--------------------------------------|------------------------------------------|------------------------------------------|
|              |                               | % of<br>identity | Conserved<br>nucleotide sites<br>in alignment | % of conserved<br>nucleotide sites<br>in alignment | # codons<br>analysed<br>by<br>MEME | # (%)<br>assigned<br>codons from<br>MEME | % codons under<br>positive selection | % of codons under<br>purifying selection | % of codons<br>that evolved<br>neutrally |
| <i>AGRP</i>  | 585                           | 74.0%            | 192                                           | 32.8%                                              | 195                                | 88 (45.1%)                               | 3.4%                                 | 88.6%                                    | 8.0%                                     |
| <i>ASIP</i>  | 438                           | 75.4%            | 114                                           | 26.0%                                              | 146                                | 79 (54.1%)                               | 6.3%                                 | 77.2%                                    | 16.5%                                    |
| <i>POMC</i>  | 2'598                         | 81.3%            | 115                                           | 4.4%                                               | 866                                | 269 (31.1%)                              | 3.0%                                 | 88.1%                                    | 8.9%                                     |
| <i>PCSK1</i> | 3'159                         | 83.5%            | 838                                           | 26.5%                                              | 1'053                              | 634 (60.2%)                              | 1.6%                                 | 94.3%                                    | 4.1%                                     |
| <i>PCSK2</i> | 2'430                         | 81.4%            | 795                                           | 32.7%                                              | 810                                | 545 (67.3%)                              | 2.2%                                 | 95.2%                                    | 2.6%                                     |
| <i>MC1R</i>  | 1'083                         | 76.7%            | 317                                           | 29.3%                                              | 361                                | 206 (57.1%)                              | 3.4%                                 | 89.8%                                    | 6.8%                                     |
| <i>MC2R</i>  | 1'110                         | 72.2%            | 323                                           | 29.1%                                              | 370                                | 226 (61.1%)                              | 2.2%                                 | 91.6%                                    | 6.2%                                     |
| <i>MC3R</i>  | 993                           | 80.0%            | 323                                           | 32.5%                                              | 331                                | 247 (74.6%)                              | 1.6%                                 | 92.7%                                    | 5.7%                                     |
| <i>MC4R</i>  | 1'044                         | 77.6%            | 436                                           | 41.8%                                              | 348                                | 264 (75.9%)                              | 0.4%                                 | 95.1%                                    | 4.6%                                     |
| <i>MC5R</i>  | 1'005                         | 76.3%            | 416                                           | 41.4%                                              | 335                                | 230 (68.7%)                              | 2.2%                                 | 93.9%                                    | 3.9%                                     |
| <b>Mean</b>  | <b>1'445</b>                  | <b>77.8%</b>     | <b>386.9</b>                                  | <b>29.7%</b>                                       | <b>482</b>                         | <b>279</b>                               | <b>2.6%</b>                          | <b>90.7%</b>                             | <b>6.7%</b>                              |

7 **Supplementary Table 2. Characteristics of the intra-molecular alignments.** For each  
8 gene pair, the number of sampled species, the size of the concatenated alignments, and the  
9 size of the concatenated alignment once conserved positions were filtered out (conservation  
10 score  $\geq 0.9$ ) are given.

| Gene pair |       | Number of species | Intermolecular alignment size | Filtered intermolecular alignment size |
|-----------|-------|-------------------|-------------------------------|----------------------------------------|
| AGRP      | MC1R  | 17                | 529                           | 431                                    |
| AGRP      | MC2R  | 34                | 644                           | 597                                    |
| AGRP      | MC3R  | 25                | 471                           | 363                                    |
| AGRP      | MC4R  | 33                | 527                           | 451                                    |
| AGRP      | MC5R  | 31                | 593                           | 543                                    |
| ASIP      | AGRP  | 30                | 317                           | 283                                    |
| ASIP      | MC1R  | 26                | 546                           | 428                                    |
| ASIP      | MC2R  | 28                | 661                           | 555                                    |
| ASIP      | MC3R  | 24                | 488                           | 395                                    |
| ASIP      | MC4R  | 31                | 544                           | 403                                    |
| ASIP      | MC5R  | 25                | 610                           | 519                                    |
| PCSK1     | AGRP  | 28                | 790                           | 659                                    |
| PCSK1     | ASIP  | 22                | 807                           | 541                                    |
| PCSK1     | MC1R  | 16                | 1019                          | 883                                    |
| PCSK1     | MC2R  | 27                | 1134                          | 1080                                   |
| PCSK1     | MC3R  | 19                | 961                           | 667                                    |
| PCSK1     | MC4R  | 26                | 1017                          | 957                                    |
| PCSK1     | MC5R  | 23                | 1083                          | 984                                    |
| PCSK2     | AGRP  | 28                | 672                           | 632                                    |
| PCSK2     | ASIP  | 22                | 689                           | 561                                    |
| PCSK2     | PCSK1 | 27                | 1162                          | 1136                                   |
| PCSK2     | MC1R  | 17                | 901                           | 785                                    |
| PCSK2     | MC2R  | 29                | 1016                          | 995                                    |
| PCSK2     | MC3R  | 21                | 843                           | 614                                    |
| PCSK2     | MC4R  | 30                | 899                           | 885                                    |
| PCSK2     | MC5R  | 27                | 965                           | 934                                    |
| MC2R      | MC1R  | 22                | 873                           | 805                                    |
| MC3R      | MC1R  | 19                | 700                           | 580                                    |
| MC3R      | MC2R  | 25                | 815                           | 634                                    |
| MC4R      | MC1R  | 29                | 756                           | 695                                    |

|      |       |    |     |     |
|------|-------|----|-----|-----|
| MC4R | MC2R  | 41 | 871 | 850 |
| MC4R | MC3R  | 29 | 698 | 570 |
| MC5R | MC1R  | 17 | 822 | 756 |
| MC5R | MC2R  | 32 | 927 | 908 |
| MC5R | MC3R  | 24 | 754 | 676 |
| MC5R | MC4R  | 36 | 810 | 808 |
| POMC | AGRP  | 30 | 281 | 281 |
| POMC | ASIP  | 21 | 298 | 206 |
| POMC | PCSK1 | 27 | 771 | 771 |
| POMC | PCSK2 | 30 | 653 | 653 |
| POMC | MC1R  | 17 | 510 | 487 |
| POMC | MC2R  | 28 | 625 | 623 |
| POMC | MC3R  | 17 | 452 | 326 |
| POMC | MC4R  | 30 | 508 | 508 |
| POMC | MC5R  | 27 | 574 | 571 |

11 **Supplementary table 3. Coevolutionary response of the melanocortin system to selection on target genes.** The table shows the number of nucleotides of a target gene  
12 that belong to a codon under positive selection (in rows) and induced a coevolutionary response in the other nine genes of the melanocortin system (in columns). For  
13 example in the table A, 10 nucleotides, which are part of a codon under positive selection in *MC1R*, induced a change in 10 sites in *MC5R* during vertebrate evolution. For  
14 each target gene, we give the number of pairs of sites that coevolved (note that a given site within a codon can be implicated in more than one pair of sites). We also  
15 provide the number of sites that belong to a codon under positive selection of a target gene that induced an evolutionary response in at least one of the other genes of the  
16 melanocortin system (this number can be smaller than the number of pairs because the same site can be involved in several pairs). We finally give the length in  
17 nucleotides of each human target gene and the percentage (in relation to this sequence length) of the number of different sites that belong to a codon under positive  
18 selection of a target gene and that induced an evolutionary response, which indicates the mean percentage of sites that coevolved with other genes of the melanocortin  
19 system. The sequences used in the coevolution and selection analyses were trimmed to remove conserved sites and regions of the alignment containing ambiguities. The  
20 length of the nucleotide sequence is therefore shorter than the total length given in Supplementary table 1. To evaluate the robustness of our method in assessing  
21 coevolution, we applied three  $\Delta AIC$  thresholds based on the 0.975 (A), 0.95 (table 1) and 0.90 (B) percentiles of the null distribution of  $\Delta AIC$  obtained by simulations.  
22 Whether the frequency of number of pairs or the frequency of number of sites per gene was significantly different than the frequency estimated for the rest of the genes in  
23 the melanocortin system was tested using Pearson's  $\chi^2$  tests corrected for multiple testing using the Benjamini-Hochberg approach. Genes with frequencies in the number  
24 of pairs or the number of sites significantly above the frequency for the rest of the genes are denoted with an 'a' superscript and those with frequencies below are denoted  
25 with a 'b' superscript. No superscript denotes non-significant differences.

27 Supplementary table 3A) Threshold 0.975

| Coevolutionary response to positive selection on target genes |              |             |             |              |              |             |             |             |             |             | Nucleotide<br>sequence<br>length | Nb<br>pairs | Nb<br>different<br>sites | % Nb<br>different<br>sites |      |
|---------------------------------------------------------------|--------------|-------------|-------------|--------------|--------------|-------------|-------------|-------------|-------------|-------------|----------------------------------|-------------|--------------------------|----------------------------|------|
|                                                               | <i>ASIP</i>  | <i>AGRP</i> | <i>POMC</i> | <i>PCSK1</i> | <i>PCSK2</i> | <i>MC1R</i> | <i>MC2R</i> | <i>MC3R</i> | <i>MC4R</i> | <i>MC5R</i> |                                  |             |                          |                            |      |
| Positive selection on target genes                            | <i>ASIP</i>  | -           | 3           | 0            | 0            | 5           | 1           | 8           | 5           | 0           | 0                                | 396         | 39 <sup>a</sup>          | 15 <sup>a</sup>            | 3.8% |
|                                                               | <i>AGRP</i>  | 1           | -           | 3            | 3            | 2           | 0           | 5           | 2           | 0           | 0                                | 396         | 25 <sup>a</sup>          | 8                          | 2.0% |
|                                                               | <i>POMC</i>  | 0           | 0           | -            | 0            | 0           | 0           | 3           | 0           | 0           | 0                                | 801         | 6 <sup>b</sup>           | 3 <sup>b</sup>             | 0.4% |
|                                                               | <i>PCSK1</i> | 0           | 4           | 4            | -            | 4           | 3           | 11          | 3           | 0           | 0                                | 2'256       | 67 <sup>b</sup>          | 19                         | 0.8% |
|                                                               | <i>PCSK2</i> | 3           | 0           | 0            | 4            | -           | 3           | 5           | 2           | 0           | 0                                | 1'914       | 32 <sup>b</sup>          | 9 <sup>b</sup>             | 0.5% |
|                                                               | <i>MC1R</i>  | 2           | 1           | 0            | 1            | 2           | -           | 5           | 5           | 4           | 10                               | 951         | 74 <sup>a</sup>          | 24 <sup>a</sup>            | 2.5% |
|                                                               | <i>MC2R</i>  | 2           | 3           | 2            | 0            | 0           | 8           | -           | 1           | 11          | 4                                | 891         | 67 <sup>a</sup>          | 21 <sup>a</sup>            | 2.4% |
|                                                               | <i>MC3R</i>  | 0           | 0           | 0            | 0            | 3           | 8           | 11          | -           | 2           | 1                                | 969         | 70 <sup>a</sup>          | 15                         | 1.5% |
|                                                               | <i>MC4R</i>  | 0           | 0           | 0            | 0            | 0           | 3           | 3           | 1           | -           | 0                                | 996         | 21 <sup>b</sup>          | 5                          | 0.5% |
|                                                               | <i>MC5R</i>  | 0           | 0           | 0            | 0            | 0           | 8           | 1           | 1           | 0           | -                                | 972         | 27                       | 10                         | 1.0% |

28  
29

## 30 Supplementary table 3B) Threshold 0.90

31

|                                    |              | Coevolutionary response to positive selection on target genes |             |             |              |              |             |             |             |             |             |                            |                  |                    |                      |
|------------------------------------|--------------|---------------------------------------------------------------|-------------|-------------|--------------|--------------|-------------|-------------|-------------|-------------|-------------|----------------------------|------------------|--------------------|----------------------|
|                                    |              | <i>ASIP</i>                                                   | <i>AGRP</i> | <i>POMC</i> | <i>PCSK1</i> | <i>PCSK2</i> | <i>MC1R</i> | <i>MC2R</i> | <i>MC3R</i> | <i>MC4R</i> | <i>MC5R</i> | Nucleotide sequence length | Nb pairs         | Nb different sites | % Nb different sites |
| Positive selection on target genes | <i>ASIP</i>  | -                                                             | 6           | 3           | 6            | 8            | 3           | 14          | 9           | 11          | 4           | 396                        | 452 <sup>a</sup> | 22 <sup>a</sup>    | 5.6%                 |
|                                    | <i>AGRP</i>  | 3                                                             | -           | 5           | 4            | 4            | 0           | 7           | 2           | 4           | 6           | 396                        | 232 <sup>a</sup> | 9                  | 2.3%                 |
|                                    | <i>POMC</i>  | 0                                                             | 2           | -           | 2            | 0            | 0           | 3           | 1           | 0           | 3           | 801                        | 53 <sup>b</sup>  | 11                 | 1.4%                 |
|                                    | <i>PCSK1</i> | 7                                                             | 8           | 11          | -            | 10           | 5           | 14          | 6           | 8           | 9           | 2'256                      | 649 <sup>b</sup> | 25 <sup>b</sup>    | 1.1%                 |
|                                    | <i>PCSK2</i> | 4                                                             | 1           | 0           | 10           | -            | 3           | 6           | 2           | 5           | 3           | 1'914                      | 402 <sup>b</sup> | 14 <sup>b</sup>    | 0.7%                 |
|                                    | <i>MC1R</i>  | 5                                                             | 3           | 1           | 1            | 4            | -           | 14          | 8           | 7           | 15          | 951                        | 664 <sup>a</sup> | 37 <sup>a</sup>    | 3.9%                 |
|                                    | <i>MC2R</i>  | 4                                                             | 4           | 3           | 0            | 1            | 15          | -           | 1           | 13          | 6           | 891                        | 283              | 28 <sup>a</sup>    | 3.1%                 |
|                                    | <i>MC3R</i>  | 0                                                             | 3           | 0           | 0            | 3            | 8           | 13          | -           | 6           | 3           | 969                        | 399 <sup>a</sup> | 17                 | 1.8%                 |
|                                    | <i>MC4R</i>  | 0                                                             | 2           | 0           | 0            | 2            | 5           | 3           | 1           | -           | 0           | 996                        | 115 <sup>b</sup> | 10 <sup>b</sup>    | 1.0%                 |
|                                    | <i>MC5R</i>  | 7                                                             | 9           | 3           | 5            | 4            | 22          | 3           | 3           | 2           | -           | 972                        | 431 <sup>a</sup> | 38 <sup>a</sup>    | 3.9%                 |

32

33



55 **Supplementary table 5. Percentage of branches of the vertebrate phylogenetic tree where genes of the melanocortin system coevolved**  
 56 **as a result of positive selection.** Rows represent the proportion of branches where positive selection exerted on a target gene induced an  
 57 evolutionary response on genes written in columns.

|                                                    |              | Co-evolutionary response to positive selection on target genes |             |             |              |              |             |             |             |             |             | Mean  |
|----------------------------------------------------|--------------|----------------------------------------------------------------|-------------|-------------|--------------|--------------|-------------|-------------|-------------|-------------|-------------|-------|
|                                                    |              | <i>ASIP</i>                                                    | <i>AGRP</i> | <i>POMC</i> | <i>PCSK1</i> | <i>PCSK2</i> | <i>MC1R</i> | <i>MC2R</i> | <i>MC3R</i> | <i>MC4R</i> | <i>MC5R</i> |       |
| Proportion of branches<br>under positive selection | <i>ASIP</i>  | -                                                              | 5.3%        | 0           | 0            | 12.7%        | 20.4%       | 14.2%       | 16.1%       | 0           | 0           | 7.6%  |
|                                                    | <i>AGRP</i>  | 5.3%                                                           | -           | 9.4%        | 15.7%        | 11.8%        | 0           | 13.8%       | 4.3%        | 0           | 0           | 6.1%  |
|                                                    | <i>POMC</i>  | 0                                                              | 0           | -           | 0            | 0            | 0           | 13.3%       | 0           | 0           | 0           | 1.5%  |
|                                                    | <i>PCSK1</i> | 0                                                              | 7.9%        | 10.0%       | -            | 3.4%         | 11.0%       | 9.7%        | 16.2%       | 0           | 0           | 6.5%  |
|                                                    | <i>PCSK2</i> | 8.1%                                                           | 0           | 0           | 25.7%        | -            | 19.4%       | 25.7%       | 17.9%       | 0           | 0           | 9.9%  |
|                                                    | <i>MC1R</i>  | 6.1%                                                           | 12.9%       | 0           | 10.3%        | 12.9%        | -           | 11.3%       | 17.5%       | 12.3%       | 14.4%       | 10.2% |
|                                                    | <i>MC2R</i>  | 8.3%                                                           | 11.5%       | 22.4%       | 0            | 0            | 14.4%       | -           | 4.3%        | 11.4%       | 13.1%       | 8.6%  |
|                                                    | <i>MC3R</i>  | 0                                                              | 0           | 0           | 0            | 5.8%         | 10.1%       | 12.2%       | -           | 3.6%        | 8.9%        | 4.5%  |
|                                                    | <i>MC4R</i>  | 0                                                              | 0           | 0           | 0            | 0            | 17.5%       | 18.4%       | 18.2%       | -           | 0           | 6.0%  |
|                                                    | <i>MC5R</i>  | 0                                                              | 0           | 0           | 0            | 0            | 14.9%       | 4.9%        | 2.2%        | 0           | -           | 2.4%  |

58

59





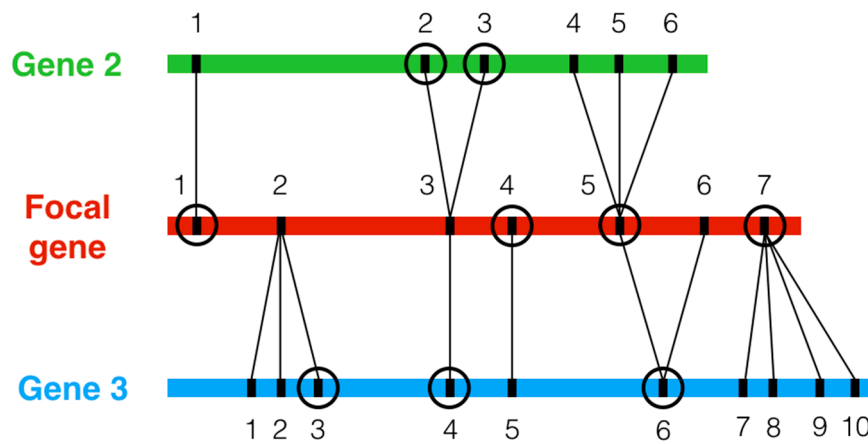

65

66 **Supplementary figure 2. Schematic presentation of indices of coevolutionary processes.**

67 i) For each focal gene, we counted the total number of pairs identified as coevolving with the  
68 other genes of the melanocortin system (Nb coevolving pairs in figure 3; note that these sites  
69 did not necessarily evolve under positive selection); here, the focal gene has six pairs of  
70 coevolving sites with Gene 2 and 11 pairs with Gene 3 and for the analysis we calculated the  
71 grand total (6 + 11). ii) Because a given site can be involved in multiple pairs, for each gene  
72 we counted the number of sites coevolving with the other genes (Nb sites in figure 3); here,  
73 the focal gene has 7 sites. iii) We calculated the percentage of sites (% coevolving sites in  
74 figure 2) that coevolved with the other genes; here 7 sites divided by the total number of  
75 nucleotide sites of the focal gene. iv) For each focal gene, we determined how many sites in a  
76 codon under positive selection coevolved with other sites of the other genes (Nb pairs under  
77 selection in figure 3); the focal gene has two sites in codons under positive selection (as  
78 indicated by the circles) that coevolved with at least one site of Gene 2 and three sites in  
79 codons under positive selection that coevolved with at least one site of Gene 3. The total  
80 number of sites in codons under positive selection on the focal gene that induces a  
81 coevolutionary response in the other genes is four. v) To measure whether the effect of  
82 positive selection exerted on a focal gene was homogeneously distributed on the other genes,  
83 we calculated the coefficient of variation (CV in figure 3) of the number of nucleotide sites in

84 codons under positive selection in the focal gene and that induced a change in at least one  
85 nucleotide site of the other genes; 2 and 3 sites in codons under positive selection of the focal  
86 gene induced changes in the nucleotide sequences of Gene 2 and Gene 3, respectively. vi).  
87 Each gene had a different number of nucleotide sites (sequence length in figure 3). vii) For  
88 each gene, we calculated the percentage of branches along the phylogenetic tree that  
89 contained sites in codons under positive selection that induced coevolution in sites of other  
90 genes of the melanocortin system.
